# Supplementary material for: Double-Sided Nano-ZnO: Superior Antibacterial Properties and Induced Hepatotoxicity in Zebrafish Embryos
Source: MDPI journal article supplement (doi:10.3390/toxics10030144), 2022-03-18
Supplement: s1 [file s1]

# Supplementary Materials: Double-Sided Nano-ZnO: Superior Antibacterial Properties and Induced Hepatotoxicity in Zebrafish Embryos

Mingyue He, Xueting Li, Lidong Yu, Shuai Deng, Ning Gu, Li Li, Jianbo Jia and Bingsheng Li

**Table S1.** Statistics of zebrafish malformations treated with different concentrations of nano-ZnO.

| Deformed parts | control | 31.25 nmol/mL | 62.5 nmol/mL | 125 nmol/mL |
|----------------|---------|---------------|--------------|-------------|
| Yolk sac       | 4/57    | 6/32          | 8/21         | 4/4         |
| Heart          | 0/57    | 0/32          | 0/21         | 3/4         |
| Deformity rate | 4/57    | 6/32          | 8/21         | 4/4         |

**Table S2.** Development of zebrafish swim bladder treated with different concentrations of nano-ZnO.

| Concentration           | control | 31.25 nmol/mL | 62.5 nmol/mL | 125 nmol/mL |
|-------------------------|---------|---------------|--------------|-------------|
| Normal development rate | 57/57   | 2/32          | 0/21         | 0/4         |

**Table S3.** Oligonucleotide primers.

| Genes                            | Primer Sequences         | Genes            | Primer Sequences      |
|----------------------------------|--------------------------|------------------|-----------------------|
| <i>ef1<math>\alpha</math>-f</i>  | CCTGGGAGTGAAACAGCTGATC   | <i>bid-f</i>     | GTCCACCAGCGACCTACA    |
| <i>ef1<math>\alpha</math>-r</i>  | CCGATCTTCTTGATGTATGCGCTG | <i>bid-r</i>     | GCACCACTGTCCCATAAAA   |
| <i>bax-f</i>                     | GGAGGCGATACGGGCAGTG      | <i>bcl-2-f</i>   | TCGTCAGACCCTCATTT     |
| <i>bax-r</i>                     | TTGCGAATCACCAATGCTGTG    | <i>bcl-2-r</i>   | CATCCCAACCTCCATTTT    |
| <i>il-1b-f</i>                   | TGGACTTCGCAGCACAAAATG    | <i>srebp-1-f</i> | CATCCACATGGCTCTGAGTG  |
| <i>il-1b-r</i>                   | GTTCACTTCACGCTCTTGATG    | <i>srebp-1-r</i> | CTCATCCACAAAAGAAGCGGT |
| <i>tnf-<math>\alpha</math>-f</i> | GCTGGATCTTCAAAGTCGGGTGTA | <i>fabp10a-f</i> | GTGGGAGAATCGGTCAG     |
| <i>tnf-<math>\alpha</math>-r</i> | TGTGAGTCTCAGCACACTTCCATC | <i>fabp10a-r</i> | TCAGGAGAACTACGAGGAG   |
| <i>nf-<math>\kappa</math>b-f</i> | AAGATGAGAACGGAGACACGC    | <i>rbp4-f</i>    | AGGTGCCGTCCTCATCC     |
| <i>nf-<math>\kappa</math>b-r</i> | TACCAGCAATCGCAAACAACG    | <i>rbp4-r</i>    | CAACTTCGCCGTCCAAC     |
| <i>bip-f</i>                     | AGCTGTACAAGAAGAAGAC      | <i>chop-f</i>    | GGACACGTAGAGAAGGGGAC  |
| <i>bip-r</i>                     | GAAAGTTACCTCGATCTGTGGG   | <i>chop-r</i>    | TCTCGGTGGGAGACATTAC   |
| <i>gstp1-f</i>                   | CGACTGAAAGCCACCTGTGTC    | <i>perk-f</i>    | GACGAATGCTCCACTGTCCT  |
| <i>gstp1-r</i>                   | CTGTCGTTTTTGCCATATGCAGC  | <i>perk-r</i>    | GTGTTGGACTTGACGATGCG  |
| <i>nqo1-f</i>                    | TTTGCAGAATCCCGAGCACT     | <i>bip-f</i>     | AAGAGGCCGAAGAGAAGGAC  |
| <i>nqo1-r</i>                    | TCTTCTGCGATCAAGCTGAAAG   | <i>bip-r</i>     | AGCAGCAGAGCCTCGAAATA  |
| <i>nrf2a-f</i>                   | TGGACGAACACTAACACGGG     | <i>mcl-1b-f</i>  | CCAGAACTGAAAGCGCATA   |
| <i>nrf2a-r</i>                   | CCTGCTGCATTGCGAAAGTT     | <i>mcl-1b-r</i>  | ACTCCACAAAGCCATCCC    |
| <i>nrf2b-f</i>                   | GGCAGAGGGAGGAGGAGACCAT   | <i>wnt2bb-f</i>  | TATTGGAGCCCTTGGTGC    |
| <i>nrf2b-r</i>                   | AAACAGCAGGGCAGACAACAAGG  | <i>wnt2bb-r</i>  | GCGGTGATGACGAAACTGA   |
| <i>ef2<math>\alpha</math>-f</i>  | GGACAGATGGAAGTTTGGGATG   | <i>mypt1-f</i>   | AGCCTGCTGTCCCGGTATTG  |
| <i>ef2<math>\alpha</math>-r</i>  | CGGTTTGTGCGTAGAGCC       | <i>mypt1-r</i>   | GAGTGAGGTACGATCTGCG   |
